# Supplementary material
Source: PubMed Central journal article supplement (PMC5697767)
Supplement: NIHMS920251-supplement-eFigure_1_and_2.pdf [file NIHMS920251-supplement-eFigure_1_and_2.pdf]

## Supplementary Online Content

Santosa KB, Fattah A, Gavilán J, Hadlock TA, Snyder-Warwick AK. Photographic standards for patients with facial palsy and recommendations by members of the Sir Charles Bell Society. *JAMA Facial Plast Surg*. Published online January 26, 2017. doi:10.1001/jamafacial.2016.1883

**eFigure 1.** Survey to SCBS Members

**eFigure 2.** View of Patient Puffing Out Cheeks

This supplementary material has been provided by the authors to give readers additional information about their work.

## eFigure 1. Survey to SCBS Members

What facial assessment scales/grading systems do you routinely use to document facial movement/symmetry?

1. House-Brackmann
2. Sunnybrook facial grading scale
3. Yanagihara
4. Other; please state
5. None

What facial assessment scales/grading systems do you routinely use to document facial synkinesis?

1. Sunnybrook facial grading scale
2. Synkinesis assessment questionnaire
3. Other; please state
4. None

What facial palsy-specific patient reported outcome measure method do you use?

1. Facial Clinimetric Evaluation Scale
2. Other; please state
3. None

What other methods do you use to assess social/psychological functioning/quality of life?

1. Other; please state
2. None

For standard photography, which views/movements do you use? (select all that apply)

1. At rest/repose/expressionless
2. Elevation of eyebrows
3. Closure of eyes, gently
4. Closure of eyes, tightly
5. Smiling, small
6. Smiling, large
7. Puckering of lips, making the sound /oooo/
8. Showing bottom teeth, making the sound /eee/
9. Nasal base view
10. Snarling/wrinkling of nose
11. Other; please state

Do you employ videography?

1. Yes
2. No

If yes, do you employ the same or different movements as the still photographs?

1. Same
2. Different; explain how it differs

If you use videography, do you use anything to stabilize the head from moving?

1. Yes
2. No
3. We do not use videography

Do you employ three-dimensional imaging?

1. No
2. Yes

If so, which system(s) do you use?

1. Please explain

**eFigure 2.** View of Patient Puffing Out Cheeks

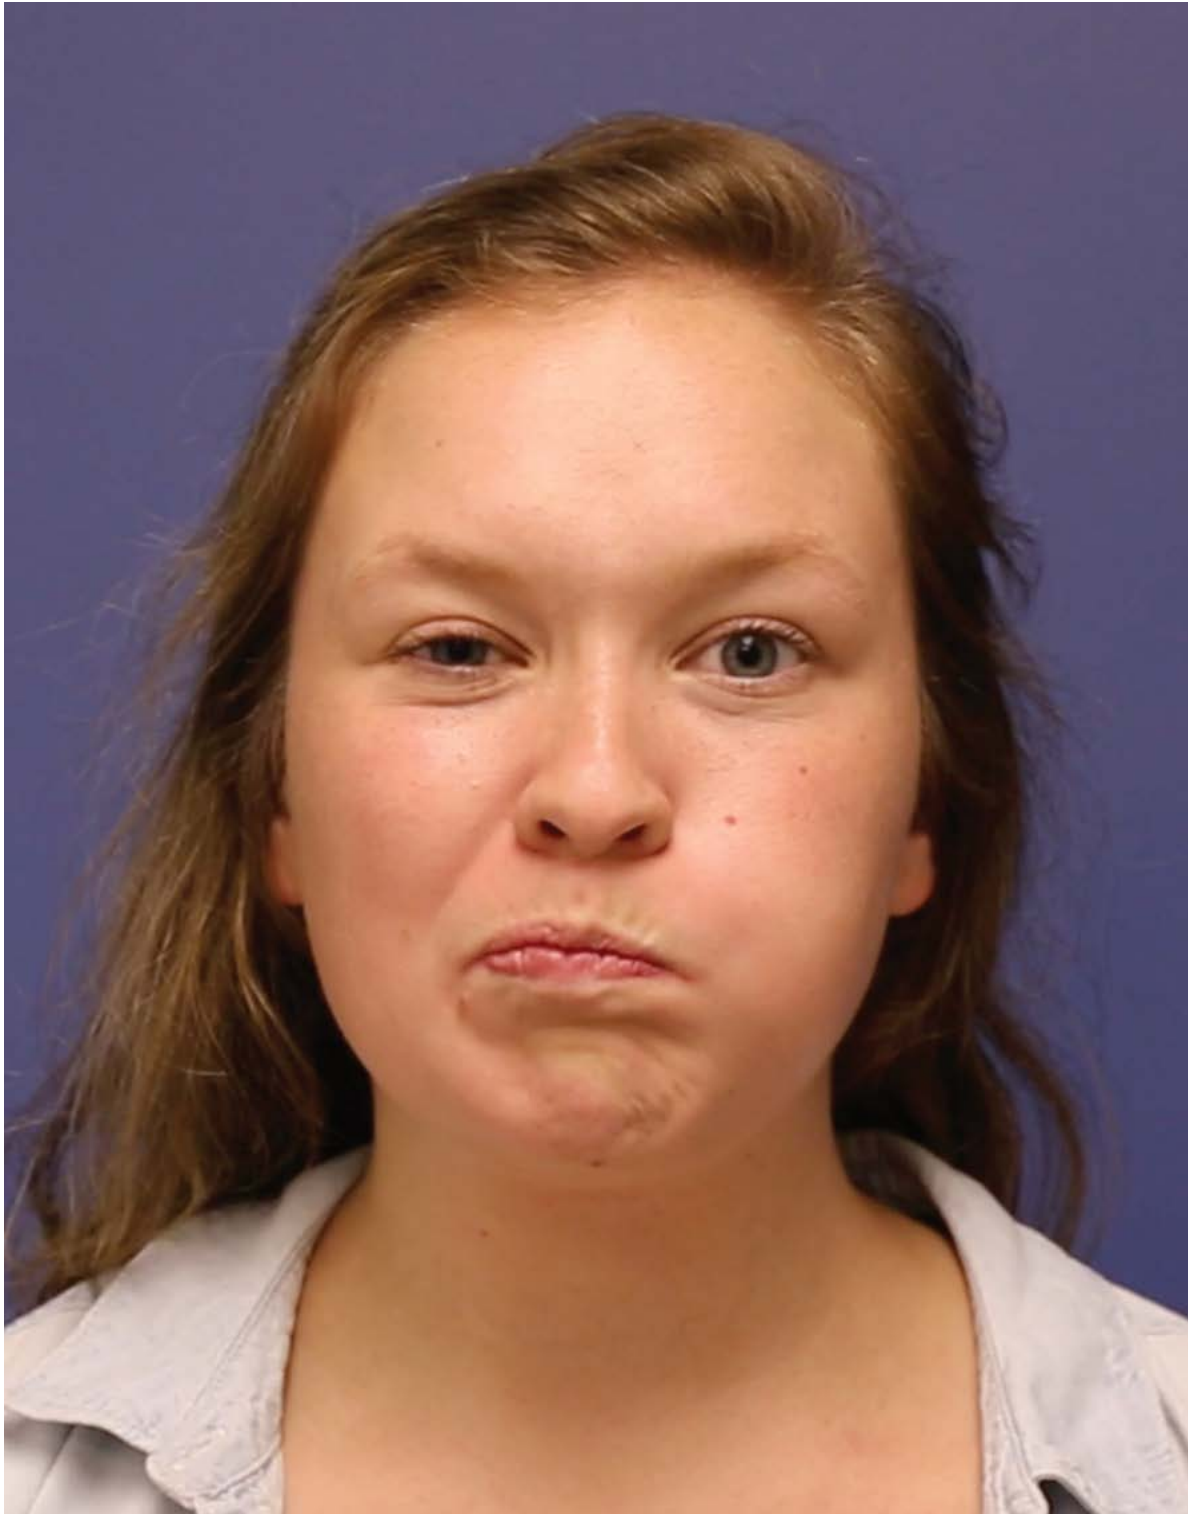

© 2017 American Medical Association. All rights reserved.
